# Supplementary material
Source: Springer Nature journal article supplement (https://www.springermedizin.de/resource/supplementary/12913_2006_382_MOESM1_ESM.pdf/9535064)
Supplement: MOESM1 [file 9535064]

Table 1. Description of independent variables

| <i>Predisposing factors</i>                    |                                                                                                                                                                                                                  |
|------------------------------------------------|------------------------------------------------------------------------------------------------------------------------------------------------------------------------------------------------------------------|
| Age                                            | Age group: 3=20-24 years, 4=25-29 years, 5=30-34 years, 6=35-39 years, 7=40-44 years, 8=45-49 years, 9=50-54 years, 10=55-59 years, 11=60-64 years, 12=65-69 years, 13=70-74 years, 14=75-79 years, 15=80+ years |
| Sex                                            | 0=female, 1=male                                                                                                                                                                                                 |
| Minority                                       | 0=white or not stated, 1=visible minority                                                                                                                                                                        |
| Education                                      | Highest level of education: 1=less than secondary education, 2=secondary graduate and no or some post-secondary education, 3=post-secondary graduate, 4=currently in school, 99=missing                          |
| <i>Enabling factors</i>                        |                                                                                                                                                                                                                  |
| Home ownership                                 | Whether a member of household owns the dwelling: 0=no, 1=yes, 99=missing                                                                                                                                         |
| Household income                               | Household income adjusted for the number of people living in the household: 1=lowest income, 2=lower middle income, 3=middle income, 4=upper middle income, 5=highest income, 99=missing                         |
| Self-help group participation                  | Attendance at self-help group: 0=no or not stated, 1=yes                                                                                                                                                         |
| Sense of belonging to community                | Strong sense of belonging to local community: 0=no, 1=yes, 99=missing                                                                                                                                            |
| <i>Need factors</i>                            |                                                                                                                                                                                                                  |
| Health Utilities Index                         | Health states, continuous: 0=death, 1=perfect health                                                                                                                                                             |
| Self-perceived health                          | 1=excellent, 2=very good, 3=good, 4=fair or poor, missing=99                                                                                                                                                     |
| Stress                                         | Amount of stress in most days: 0=not at all or not very stressed, 1= a bit stressed, 2= quite a bit or extremely stressed, 99=missing                                                                            |
| Depression                                     | Periods during which the respondent felt sad or depressed or lost interest in everyday things within the past 12 months, categorical: 0=no or mild depressive symptoms, 4=maximum, 99=missing                    |
| Activities of daily living (ADL)               | 0=no activity limitation or not stated, 1=sometimes has activity limitation, 2=often has activity limitation                                                                                                     |
| Instrumental activities of daily living (IADL) | Needs help for preparing for meals, shopping for necessities, housework, heavy household chores, personal care, or moving about inside the house: 0=no, 1=yes, 99=missing                                        |
| Birth                                          | Has given birth in the past 5 years: 0=no, 1=yes                                                                                                                                                                 |
| Injury                                         | Injured in the past 12 months: 0=no, 1=yes                                                                                                                                                                       |
| Number of chronic conditions                   | Number of chronic conditions: 0=0, 1=1, 2=2, 3=3, 4=4+, 99=missing                                                                                                                                               |
| Food allergies                                 | 0=no or not stated, 1=yes                                                                                                                                                                                        |
| Other allergies                                | Allergies other than food allergies: 0=no or not stated, 1=yes                                                                                                                                                   |
| Asthma                                         | 0=no or not stated, 1=yes                                                                                                                                                                                        |
| Arthritis                                      | Arthritis or rheumatism: 0=no or not stated, 1=yes                                                                                                                                                               |
| High blood pressure                            | 0=no or not stated, 1=yes                                                                                                                                                                                        |
| Migraine                                       | 0=no or not stated, 1=yes                                                                                                                                                                                        |
| Urinary incontinence                           | 0=no or not stated, 1=yes                                                                                                                                                                                        |
| Diabetes                                       | 0=no or not stated, 1=yes                                                                                                                                                                                        |
| Chronic bronchitis                             | Chronic bronchitis, emphysema, or chronic obstructive pulmonary disease: 0=no or not stated, 1=yes                                                                                                               |
| Heart disease                                  | Heart disease or angina: 0=no or not stated, 1=yes                                                                                                                                                               |
| Cancer                                         | 0=no or not stated, 1=yes                                                                                                                                                                                        |
| Stomach or intestinal ulcers                   | 0=no or not stated, 1=yes                                                                                                                                                                                        |
| Bowel disorders                                | Bowel disorder or Crohn's disease or colitis: 0=no or not stated, 1=yes                                                                                                                                          |
| Eye problem                                    | Cataracts or glaucoma: 0=no or not stated, 1=yes                                                                                                                                                                 |
| Thyroid condition                              | 0=no or not stated, 1=yes                                                                                                                                                                                        |
| Epilepsy                                       | 0=no or not stated, 1=yes                                                                                                                                                                                        |
| Chronic fatigue syndrome                       | Chronic fatigue syndrome, multiple chemical sensitivities, or fibromyalgia: 0=no or not stated, 1=yes                                                                                                            |
| Stroke                                         | Suffers from the effects of a stroke: 0=no or not stated, 1=yes                                                                                                                                                  |
| <i>Health behaviour</i>                        |                                                                                                                                                                                                                  |
| Overweight                                     | 0=underweight or acceptable weight, 1=overweight, 99=missing                                                                                                                                                     |
| Smoking                                        | 0=never smoked, 1=former smoker, 2=current smoker, 99=missing                                                                                                                                                    |
| Drinking                                       | 0=not regular drinker, 1=regular drinker, 99=missing                                                                                                                                                             |
| Physical activity                              | 1=moderate or inactive, 2=active, 99=missing                                                                                                                                                                     |
| Fruit and vegetable consumption                | Total daily fruit and vegetable consumption: 1=less than 5 servings per day, 2=5+ servings per day, 99=missing                                                                                                   |
| Alternative health care                        | Consulted alternative health care provider (e.g., acupuncturist, homeopath, or massage therapist) for physical, emotional or mental health for the past 12 months: 0=no or not stated, 1=yes                     |
| <i>Health services system</i>                  |                                                                                                                                                                                                                  |
| Province of residence                          | 10=Newfoundland, 11=Prince Edward Island, 12=Nova Scotia, 13=New Brunswick, 24=Quebec, 46=Manitoba, 47=Saskatchewan, 48=Alberta, 59=British Columbia                                                             |
